# Supplementary material
Source: ML conference proceedings conference paper supplement (https://proceedings.neurips.cc/paper_files/paper/2020/hash/fc2dc7d20994a777cfd5e6de734fe254-Abstract.html)
Supplement: Supplementary file [file fc2dc7d20994a777cfd5e6de734fe254-Supplemental.zip]

# Supplementary Material

## A Proof of Theorem 1

In order to prove Theorem 1 we first describe a technical hypothesis on the potential  $U$ . In detail, for all  $\delta$  positive there exists two positive integrable functions  $c_\delta(t)$  and  $\kappa_\delta(t)$  such that for every  $z \in \mathbb{R}^n$  and for all  $t \in [0, T]$  we have

$$|\nabla U(z, t)| \leq \delta(U(z, t) + |z|^2) + c_\delta(t), \quad |\partial_t U(z, t)| \leq \delta(U(z, t) + |z|^2) + \kappa_\delta(t). \quad (1)$$

Notice that here, in order to simplify the notation, we use the same symbol for  $U$  and for  $\hat{U}(z, t) := U(z, u(t))$ . We will also denote with  $w_\varepsilon$  the solution of problem (5).

As it is also remarked below the proof articulates as follow: first of all we asses the convergence of  $w_\varepsilon \rightarrow w$  by compactness arguments, basically by performing an estimate on the solution  $w_\varepsilon$ ; then the uniform estimate on the  $L^2$  norm of  $\dot{w}_\varepsilon$  is used to check that the limit  $w$  actually solves the problem (6).

*Proof.* The proof of this theorem follows the spirit of Theorem 4.2 of [26]. We will start with an uniform (in  $\varepsilon$ ) estimate of  $\|\dot{w}_\varepsilon\|_{L^2}^2$  and then we will use this estimate in weak form of the Euler equation to show the convergence of  $w_\varepsilon$  to the solution of (6). We will prove the theorem in the case  $\alpha > 0$  and  $\beta = 0$ .

*Uniform Estimate.* Start from the differential equation in (5) and scalar multiply it by  $(w'_\varepsilon - w^1)$ :

$$\varepsilon^2 \alpha w_\varepsilon^{(4)} \cdot (w'_\varepsilon - w^1) - 2\varepsilon \alpha w^{(3)} \cdot (w'_\varepsilon - w^1) + \alpha \ddot{w} \cdot (w'_\varepsilon - w^1) + \nabla U \cdot (w'_\varepsilon - w^1) = 0,$$

then integrate this equation on the interval  $(0, t)$ , and using the boundary conditions (5) integrate by parts to obtain

$$\begin{aligned} & \varepsilon^2 \alpha w_\varepsilon^{(3)}(t) \cdot (w'_\varepsilon - w^1) - \frac{\varepsilon^2 \alpha}{2} |\dot{w}_\varepsilon(t)|^2 + \frac{\varepsilon^2 \alpha}{2} |\ddot{w}_\varepsilon(0)|^2 \\ & - 2\varepsilon \alpha w_\varepsilon^{(3)}(t) \cdot (\dot{w}_\varepsilon(t) - w^1) + 2\varepsilon \alpha \int_0^t |\dot{w}_\varepsilon(s)|^2 ds + \frac{\alpha}{2} |\dot{w}_\varepsilon(t) - w^1|^2 \\ & + U(w_\varepsilon(t), t) - U(w^0, 0) - \int_0^t \nabla U(w_\varepsilon(s), s) \cdot w^1 ds - \int_0^t \partial_t U(w_\varepsilon(s), s) ds. \end{aligned}$$

Now let us integrate this equality again in the interval  $(0, T)$ , therefore obtaining

$$\begin{aligned} & \left(2\varepsilon - \frac{3}{2}\varepsilon^2\right) \int_0^T \alpha |\ddot{w}_\varepsilon(s)| ds + \frac{\varepsilon^2(1+T)}{2} \alpha |\ddot{w}_\varepsilon(0)| + \left(\frac{1}{2} - \varepsilon\right) \alpha |\dot{w}_\varepsilon(T) - w^1|^2 \\ & + 2\varepsilon \alpha \int_0^T \int_0^\tau \ddot{w}_\varepsilon(s) ds d\tau + \frac{\alpha}{2} \int_0^T |\dot{w}_\varepsilon(s) - w^1|^2 ds + U(w_\varepsilon(T), T) \\ & + \int_0^T U(w_\varepsilon(s), s) ds = \int_0^T \nabla U(w_\varepsilon(s), s) \cdot w^1 + \int_0^T \int_0^\tau \nabla U(w_\varepsilon(s), s) \cdot w^1 ds d\tau \\ & + (1+T)U(w^0, 0) + \int_0^T \int_0^\tau \partial_t U(w_\varepsilon(s), s) ds d\tau. \end{aligned}$$

Now we can take all the positive (for  $\varepsilon$  small enough) terms to the right hand side to obtain

$$\begin{aligned} & \frac{\alpha}{2} \int_0^T |\dot{w}_\varepsilon - w^1|^2 dt + \int_0^T U(w_\varepsilon(t), t) dt \leq (1+T)U(w^0, 0) \\ & + (1+T)|w^1| \int_0^T |\nabla U(w_\varepsilon(t), t)| dt \\ & + T \int_0^T |\partial_t U(w_\varepsilon(t), t)| dt. \end{aligned}$$

Now using Eq. (1) we can choose  $\delta$  to further reduce this inequality down to

$$\frac{\alpha}{2} \int_0^T |\dot{w}_\varepsilon - w^1|^2 dt + \int_0^T U(w_\varepsilon(t), t) dt \leq c(T) + C(T) \int_0^T |w_\varepsilon(t)|^2 dt, \quad (2)$$

where  $c(T)$  and  $C(T)$  are constant with respect to the parameter  $\varepsilon$ . Using Peter-Paul inequality we have that  $|\dot{w}_\varepsilon - w^1|^2 \geq (1 - \eta')|\dot{w}_\varepsilon|^2 + (1 - 1/\eta')|w^1|^2$  for all  $\eta' > 0$ . Similarly since  $w_\varepsilon \in H^2$ , we can write  $w_\varepsilon(t) = w^0 + \int_0^t \dot{w}_\varepsilon$  and using Peter-Paul and Cauchy-Schwartz we also end up with the estimate  $|w_\varepsilon - w^0| \geq (1 - \eta)|w_\varepsilon| + (1 - 1/\eta)|w^0|$  for all  $\eta > 0$ , which implies

$$\int_0^T |w_\varepsilon(t)|^2 dt \leq T \frac{1/\eta - 1}{1 - \eta} |w^0|^2 + \frac{T^2}{1 - \eta} \int_0^T |\dot{w}_\varepsilon(t)|^2 dt. \quad (3)$$

Putting together Eq. (2) and (3) we finally obtain the wanted uniform bound  $\alpha \|\dot{w}_\varepsilon\|_{L^2} \leq k(T)$ , where  $k(T)$  is a constant with respect to the parameter  $\varepsilon$ .

*Convergence.* Once we have this uniform bound we can complete the proof by arguing along the very same lines of the proof of Section 3.2 of [26] to obtain the thesis.  $\square$
